# Supplementary material
Source: PubMed Central journal article supplement (PMC2941280)
Supplement: 1007725107_pnas.201007725SI.pdf [file 1007725107_pnas.201007725SI.pdf]

# Supporting Information

Tran et al. 10.1073/pnas.1007725107

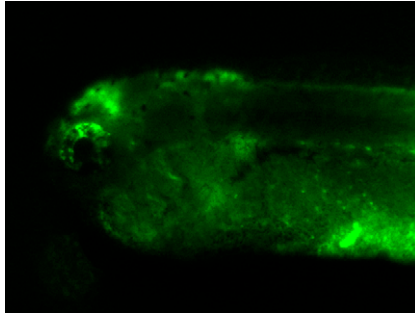

**Movie S1.** A stage 35 *Xenopus tropicalis* tadpole transgenic for the Wnt reporter Bin8Lef-GFP, showing GFP-positive blood cells leaving the VBI and entering in the circulation network.

[Movie S1 \(MOV\)](#)

## Other Supporting Information Files

[SI Appendix \(PDF\)](#)
